# Supplementary material for: How Far is the Spanish Snack Sector from Meeting the Acrylamide Regulation 2017/2158?
Source: Foods. 2020 Feb 24;9(2):247. doi: 10.3390/foods9020247 (PMC7073576; doi:10.3390/foods9020247)
Supplement: Supplementary file 1 [file foods-09-00247-s001.pdf]

## How far is the Spanish snack sector to meet the acrylamide regulation 2017/2158?

Marta Mesias\*, Aouatif Nouali, Cristina Delgado-Andrade, Francisco J Morales

### SUPPLEMENTARY

**Table S1.** Average nutritional composition of the whole dataset of potato crisps as provided by the manufacturer. Data are expressed as mean  $\pm$  standard deviation (SD) per 100 g of sample

|               | Mean $\pm$ SD  | Minimum | Maximum |
|---------------|----------------|---------|---------|
| Energy        | 536 $\pm$ 25   | 439     | 589     |
| Total fat     | 33.8 $\pm$ 4.5 | 13.2    | 40.7    |
| Saturated fat | 4.1 $\pm$ 1.0  | 1.4     | 6.1     |
| Carbohydrates | 50.1 $\pm$ 5.0 | 38.0    | 72.1    |
| Sugars        | 0.6 $\pm$ 0.6  | 0.0     | 4.7     |
| Fibre         | 4.3 $\pm$ 1.9  | 0.5     | 7.7     |
| Proteins      | 6.2 $\pm$ 1.1  | 1.0     | 7.8     |
| Salt          | 0.9 $\pm$ 0.5  | 0.0     | 1.7     |
